# Supplementary material for: Synthesis, structures and magnetic studies of hexanuclear lanthanide complexes: SMM behavior of the DyIII analogue and MCE properties of the GdIII analogue
Source: Royal Society of Chemistry journal article supplement (doi:10.1039/d3dt01489d), 2023-01-01
Supplement: d3dt01489d1.pdf [file d3dt01489d1.pdf]

### *Electronic Supporting Information*

#### **Synthesis, Structures and Magnetic studies of Hexanuclear Lanthanide Complexes: SMM behavior in Dy<sup>III</sup> analogue and MCE properties in Gd<sup>III</sup> analogue**

*Pawan Kumar,<sup>a,d</sup> Pankaj Kalita,<sup>b</sup> María A. Palacios,<sup>c</sup> Vierandra Kumar,<sup>a</sup> Joydev Acharya,<sup>a</sup>  
Enrique Colacio<sup>\*c</sup> and Vadapalli Chandrasekhar<sup>\*a,d</sup>*

<sup>a</sup>Department of Chemistry, Indian Institute of Technology Kanpur, Kanpur-208016, India

<sup>b</sup>Department of Chemistry, Nowgong Girls College, Nagaon, Assam-782002, India

<sup>c</sup>Department of Inorganic Chemistry, University of Granada, 18071-Granada, Spain

<sup>d</sup>Tata Institute of Fundamental Research Hyderabad, Gopanpally, Hyderabad-500107, India

**Table S1.** Details of solvent mask

| Sl. No.              | Volume/ Formula<br>Unit<br>( $\text{\AA}^3$ ) | Electron Count/ Formula<br>Unit | Contents/Formula<br>Unit                 |
|----------------------|-----------------------------------------------|---------------------------------|------------------------------------------|
| <b>1</b><br>(AJ1860) | 180                                           | 36                              | 2 CH <sub>3</sub> OH                     |
| <b>2</b><br>(AJ1863) | 302                                           | 80                              | 2 CH <sub>3</sub> OH, 4 H <sub>2</sub> O |
| <b>3</b><br>(AJ1920) | 252                                           | 40                              | 4 H <sub>2</sub> O                       |
| <b>4</b><br>(AJ1851) | 238                                           | 70                              | 4 CH <sub>3</sub> OH                     |

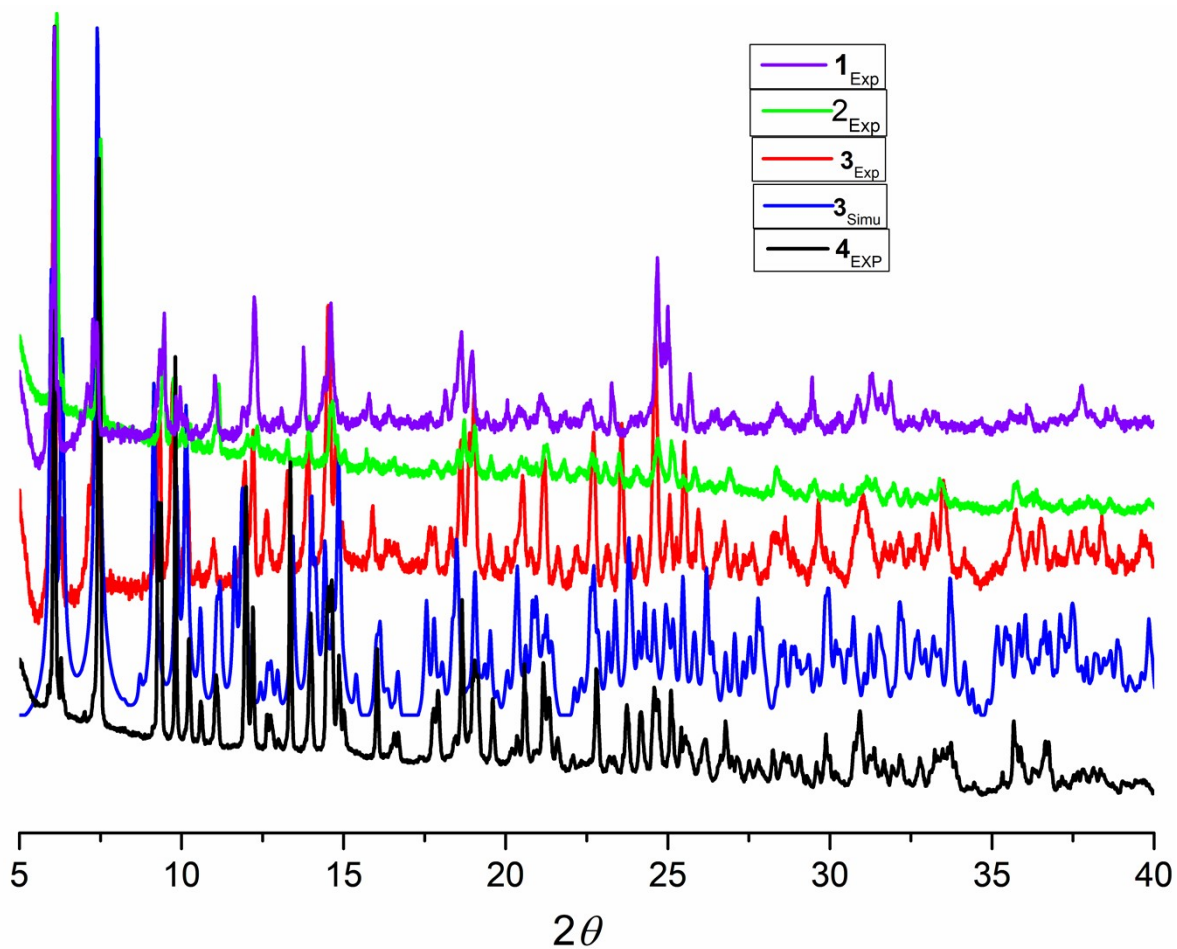

**Figure S1.** Experimental powder XRD patterns of **1**(in violet), **2**(in green), **3**(in red), **4**(in black) with the simulated powder XRD from single crystal data for **3**(in blue).

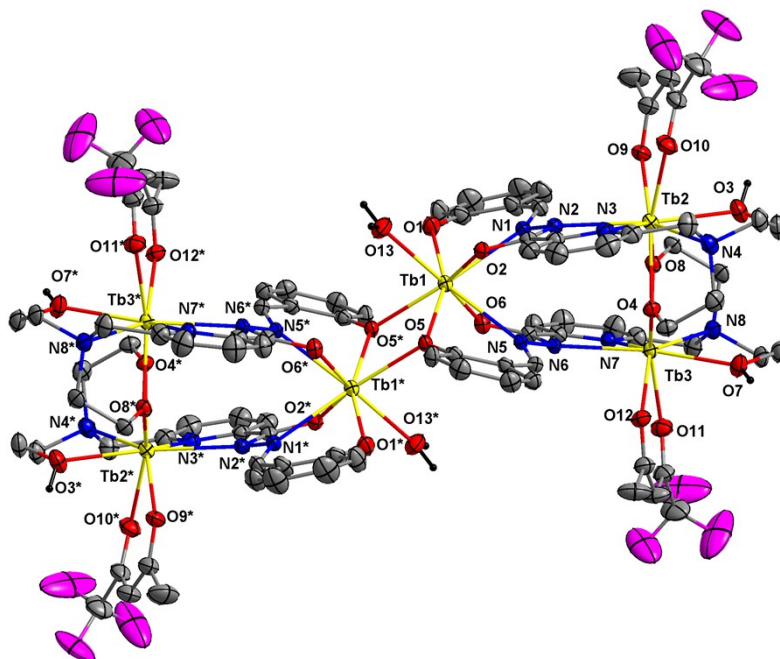

**Figure S2.** Molecular structure of **2** (selected hydrogen atoms and the solvent molecules have been omitted for clarity). Thermal ellipsoids at 30% probability level are shown. Color codes: N = blue; O = red; C = grey; Tb= yellow; H = black, and F = pink). Selected bond lengths (Å) for **2**: for Tb1; Tb1–O1, Tb1–O2, Tb1–O5, Tb1–O5\*, Tb1–O6, Tb1–O13, Tb1–N1, Tb1–N5, are 2.304(4), 2.332(4), 2.380(4), 2.368(3), 2.351(4), 2.417(5), 2.519(4), 2.538(4), respectively, for Tb2; Tb2–O3, Tb2–O4, Tb2–O8, Tb2–O9, Tb2–O10, Tb2–N2, Tb2–N3, Tb2–N4, are 2.410(4), 2.305(4), 2.291(4), 2.359(4), 2.382(4), 2.525(4), 2.526(5), 2.615(5), respectively, for Tb3; . Tb3–O4, Tb3–O7, Tb3–O8, Tb3–O11, Tb3–O12, Tb3–N6, Tb3–N7, Tb3–N8, are 2.307(4), 2.435(4), 2.288(4), 2.398(4), 2.342(4), 2.536(4), 2.523(5), 2.600(4), respectively, and selected bond angles (°) for **2**: Tb1–O5–Tb1\*, Tb3–O8–Tb2, Tb3–O4–Tb2, 108.37(14)°, 110.81(14)° , 109.62(15)°, respectively.

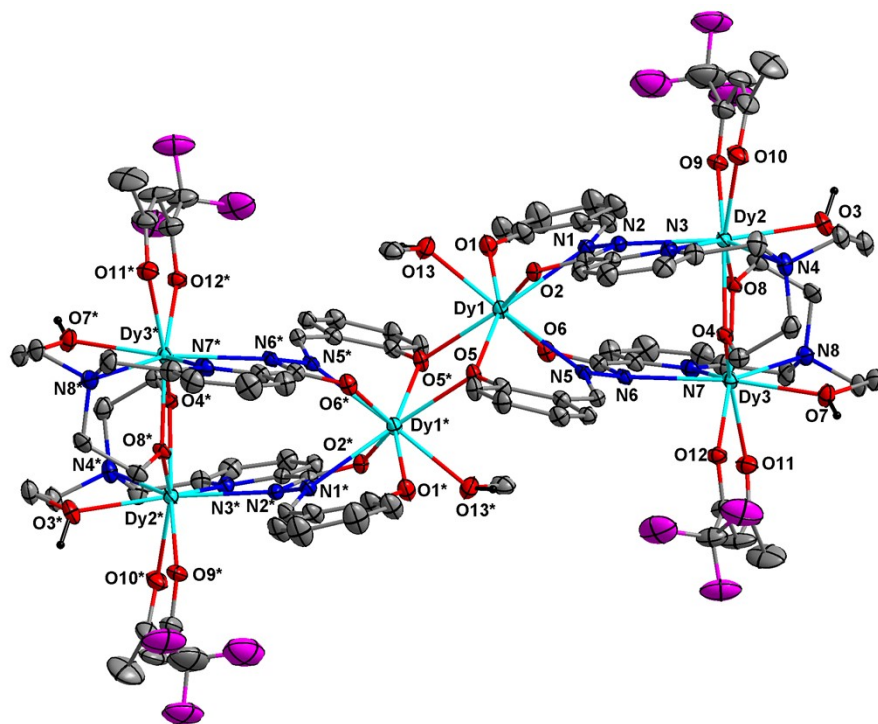

**Figure S3.** Molecular structure of **3** (selected hydrogen atoms and the solvent molecules have been omitted for clarity). Thermal ellipsoids at 30% probability level are shown. Color codes: N = blue; O = red; C = grey; Dy = cyan, H = black; and F = pink). Selected bond lengths (Å) for **3**: for Dy1; Dy1–O1, Dy1–O2, Dy1–O5, Dy1–O5\*, Dy1–O6, Dy1–O13, Dy1–N1, Dy1–N5, are 2.278(5), 2.311(4), 2.345(4), 2.362(4), 2.331(4), 2.412(5), 2.507(5), 2.512(5), respectively, for Dy2; Dy2–O3, Dy2–O4, Dy2–O8, Dy2–O9, Dy2–O10, Dy2–N2, Dy2–N3, Dy2–N4, are 2.413(4), 2.474(4), 2.283(4), 2.334(4), 2.366(5), 2.503(5), 2.513(5), 2.605(5), respectively, for Dy3; . Dy3–O4, Dy3–O7, Dy3–O8, Dy3–O11, Dy3–O12, Dy3–N6, Dy3–N7, Dy3–N8, are 2.303(4), 2.422(4), 2.267(4), 2.369(4), 2.314(5), 2.504(5), 2.509(5), 2.597(5), respectively, and selected bond angles (°) for **3**: Dy1–O5– Dy1\*, Dy3–O4– Dy2, Dy3–O8– Dy2, 108.93(15) °, 110.01(16)°, 110.97(16)°, respectively.

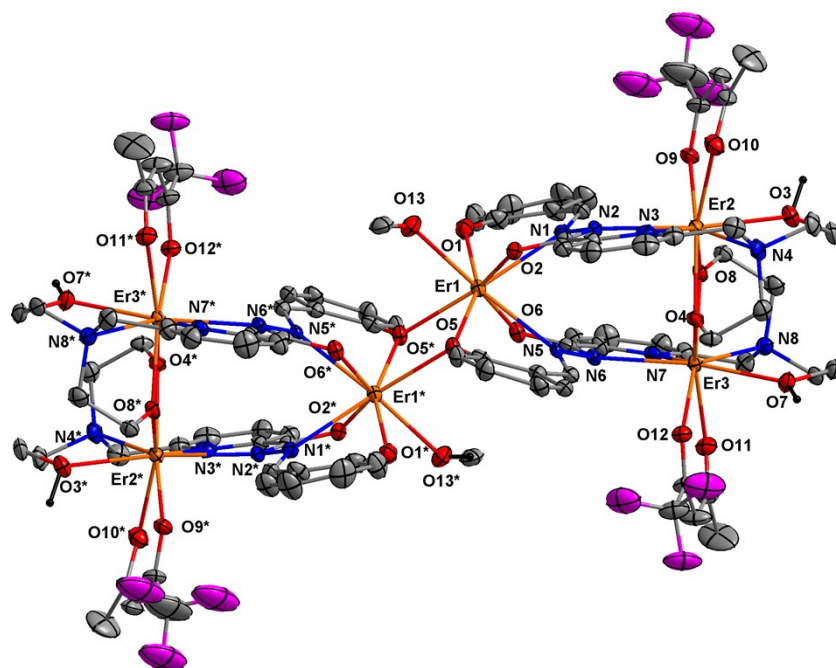

**Figure S4.** Molecular structure of **4** (selected hydrogen atoms and the solvent molecules have been omitted for clarity). Thermal ellipsoids at 30% probability level are shown. Color codes: N = blue; O = red; C = grey; Er = orange; H = black; and F = pink) Selected bond lengths (Å) for **4**: for Er1; Er1–O1, Er1–O2, Er1–O5, Er1–O5\*, Er1–O6, Er1–O13, Er1–N1, Er1–N5, are 2.293(7), 2.294(7), 2.342(7), 2.337(6), 2.303(7), 2.375(7), 2.496(8), 2.491(7), respectively, for Er2; Er2–O3, Er2–O4, Er2–O8, Er2–O9, Er2–O10, Er2–N2, Er2–N3, Er2–N4, are 2.382(7), 2.274(6), 2.269(6), 2.317(7), 2.370(7), 2.489(7), 2.498(8), 2.594(8), respectively, for Er3; Er3–O4, Er3–O7, Er3–O8, Er3–O11, Er3–O12, Er3–N6, Er3–N7, Er3–N8, are 2.270(6), 2.392(7), 2.260(6), 2.365(7), 2.313(6), 2.489(7), 2.503(8), 2.576(8), respectively, and selected bond angles for **4**: Er1–O5–Er1\*, Er3–O4–Er2, Er3–O8–Er2, 108.5(3)°, 110.2(2)°, 110.7(3)°, respectively.

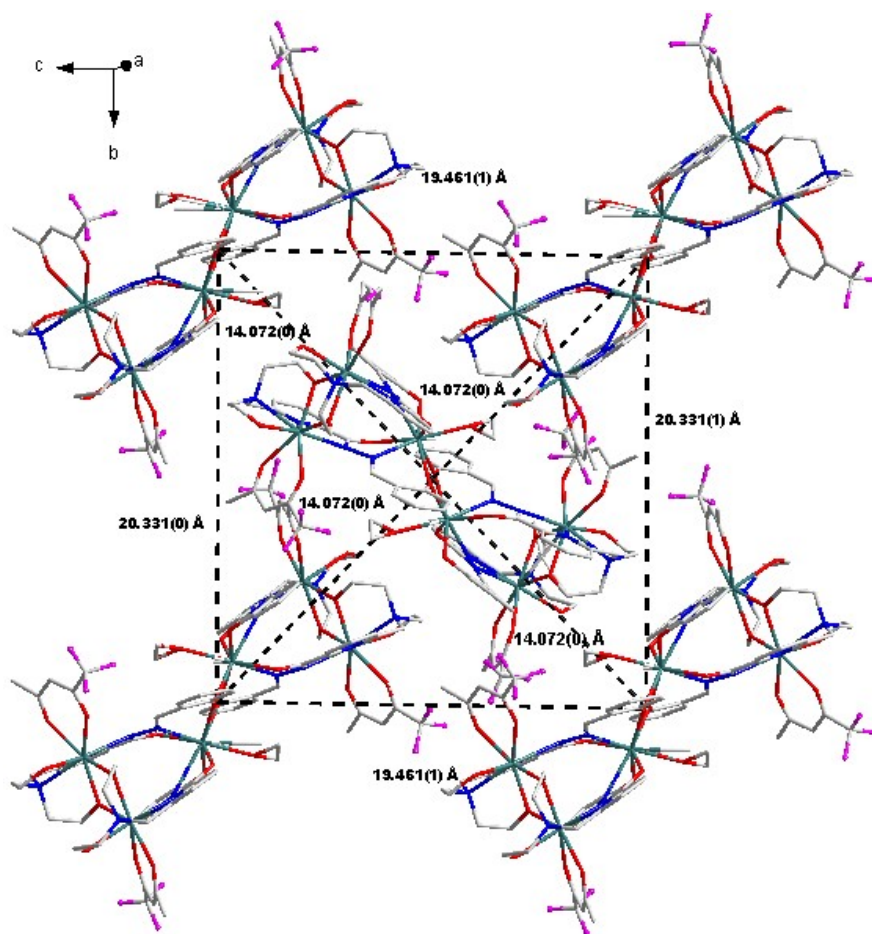

**Figure S5.** 2D supramolecular structure of complex **1** (selected carbon, hydrogen is omitted for clarity). Color codes: N = blue; O = red; C = grey; Gd= dark green; and F = pink)

**Table S2.** Continuous Shape Measures (CShM) calculations for **1**.

| Complex_Metal Centre | Structure <sup>†</sup> |              |         |        |
|----------------------|------------------------|--------------|---------|--------|
|                      | SAPR-8                 | TDD-8        | JBTPR-8 | BTPR-8 |
| <b>1_Gd1</b> CShM    | <b>1.351</b>           | 2.079        | 2.608   | 3.716  |
| <b>1_Gd2</b> CShM    | 1.810                  | <b>1.680</b> | 2.031   | 2.594  |
| <b>1_Gd3</b> CShM    | 2.069                  | <b>1.516</b> | 2.330   | 2.826  |

<sup>†</sup> SAPR-8 = Square antiprism ( $D_{4d}$ ); TDD-8 = Triangular dodecahedron ( $D_{2d}$ ); JBTPR-8 = Biaugmented trigonal prism J50 ( $C_{2v}$ ); BTPR-8 = Biaugmented trigonal prism ( $C_{2v}$ )



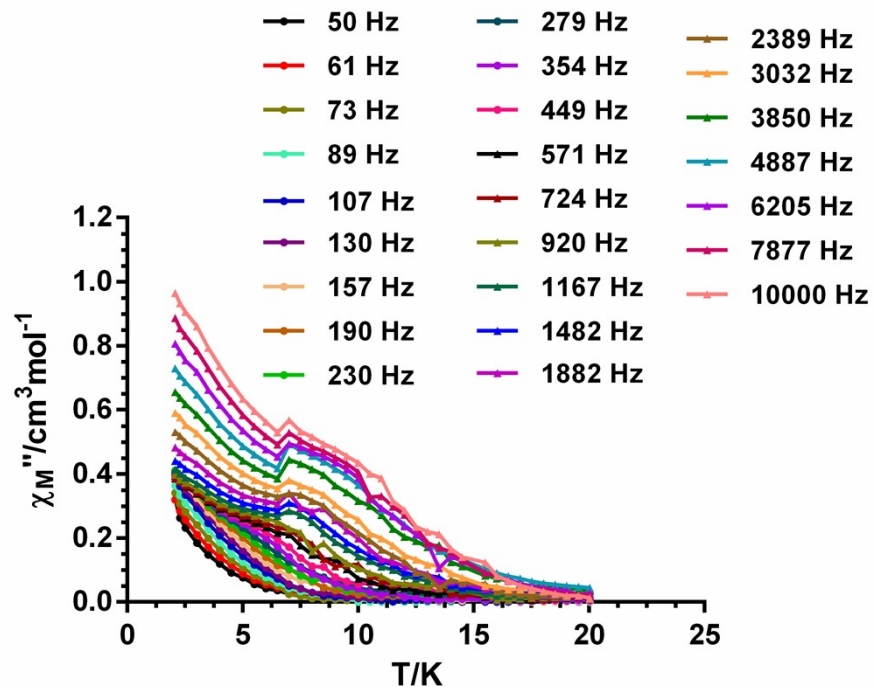

**Figure S6.** Temperature dependence of out-of-phase signals ( $\chi''_M$ ) for **3** at zero field and at the indicated frequencies.

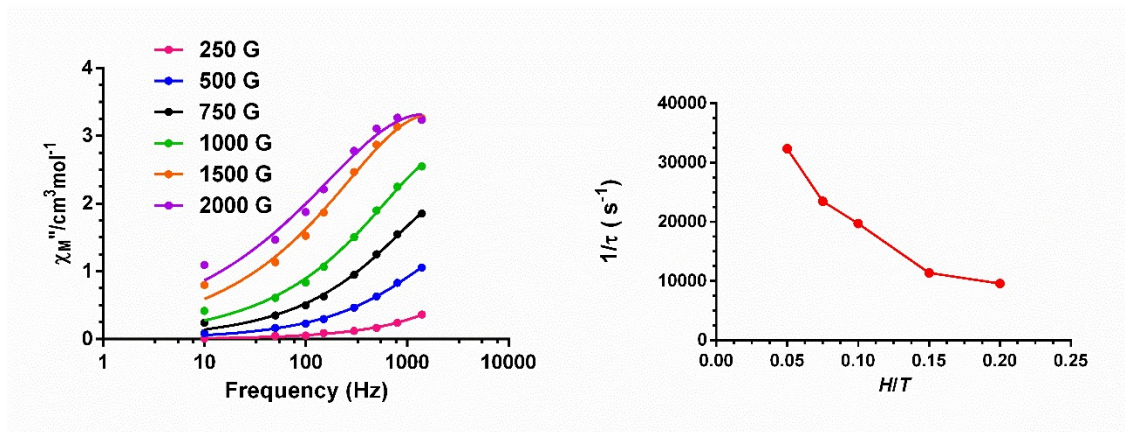

**Figure S7.** Frequency dependence of the of out-of-phase signals ( $\chi''_M$ ) for **3** at the indicated fields (*left*). Field dependence of the inverse of the relaxation times (*right*). Solid red line is a guide for the eye.

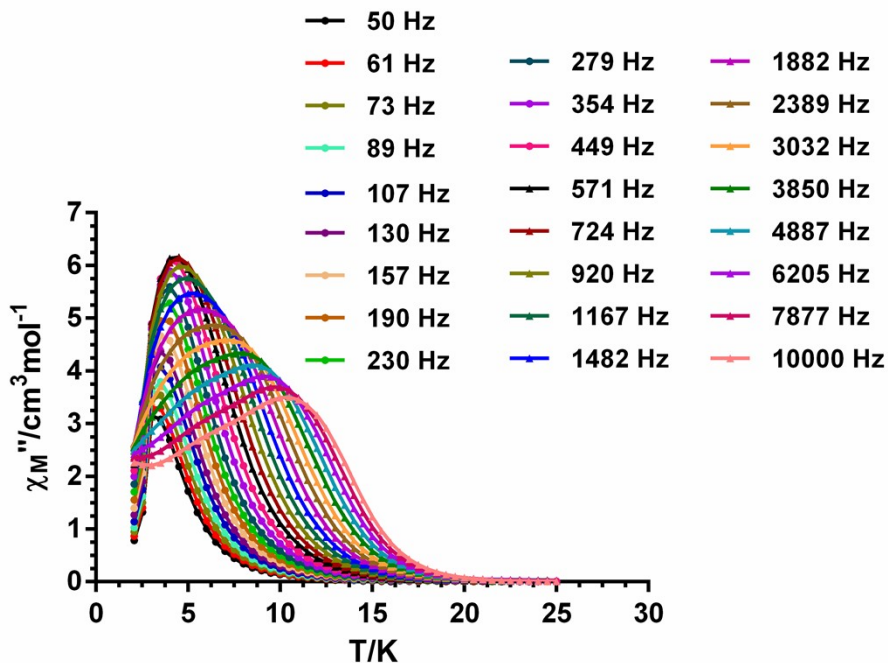

Temperature dependence of out-of-phase signals ( $\chi''_M$ ) for **3** at  $H_{dc} = 0.2$  T and at the indicated frequencies.

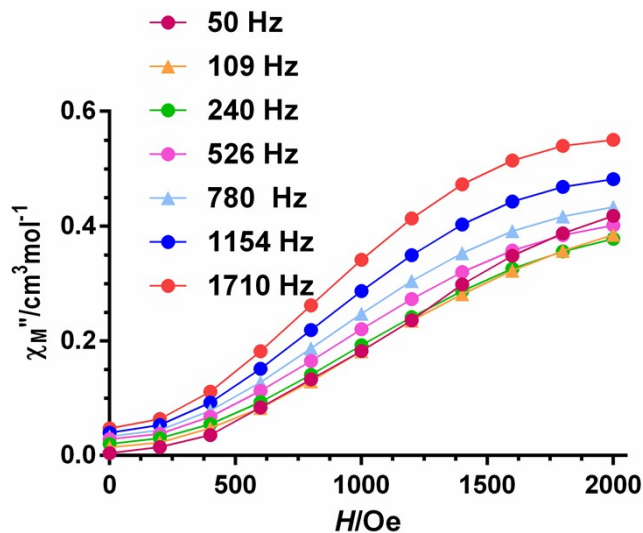

**Figure S9.** Field dependence of out-of-phase signals ( $\chi''_M$ ) for **4** at the indicated frequencies and at a temperature of 2.5 K.
